1  
2  
3  
4  
5  
6  
7  
8  
9  
10  
11  
12  
13  
14  
15  
16  
17  
18  
19  
20  
21  
22  
23  
24  
25  
26  
27  
28

***Small-scale field assessment of efficacy of the autodissemination approach against Aedes sp. in an urban area***

Ahmad Mohiddin Mohd Ngesom<sup>1¶</sup>, Hidayatulfathi Othman<sup>1¶\*</sup>, Rawaida Bahauddin<sup>1¶</sup>, Nazni Wasi Ahmad<sup>2&</sup>, Lee Han Lim<sup>2&</sup>, Asmalia Md Lasim<sup>4¶</sup>, Yanfeng Liang<sup>5¶</sup>, David Greenhalgh<sup>5¶</sup>, Jasmine Chia Siew Min<sup>6&</sup>, Mazrura Sahani<sup>1¶</sup>, Rozita Hod<sup>3¶</sup>, Topek Omar<sup>7&</sup>

<sup>1</sup> School of Applied Health Sciences, Faculty of Health Sciences, Universiti Kebangsaan Malaysia, Jalan Raja Muda A. Aziz, 50300 Kuala Lumpur, Malaysia.

<sup>2</sup> Medical Entomology Unit, Infectious Disease Research Centre, Institute for Medical Research, Jalan Pahang, 50588 Kuala Lumpur, Malaysia.

<sup>3</sup> Department of Community Health, Faculty of Medicine, Universiti Kebangsaan Malaysia, Jalan Yaacob Latif, Bandar Tun Razak, Cheras, 56000 Kuala Lumpur

<sup>4</sup> Faculty of Science and Technology, Universiti Kebangsaan Malaysia, Bangi, 43600 Selangor, Malaysia.

<sup>5</sup> Department of Mathematics and Statistics, University of Strathclyde, 26 Richmond Street, Glasgow, G1 1XH United Kingdom.

<sup>6</sup> Department of Biomedical Sciences, Faculty of Medicine and Health Sciences, Universiti Putra Malaysia, 43400 UPM Serdang, Selangor Darul Ehsan, Malaysia

<sup>7</sup> Disease Control Division, Ministry of Health Malaysia. Level 3, Block E10, Complex E, Federal Government Administrative Centre, 62590 Federal Territory Putrajaya, Malaysia.

29 \*Corresponding Author  
30 Prof. Dr. Hidayatulfathi Othman  
31 Email: hida@ukm.edu.my

32

### 33 **Abstract**

34 This is the first study to evaluate the efficacy of an autodissemination approach, as  
35 suggested by WHO. Therefore, the efficacy of an autodissemination approach in small-scale field  
36 trials against wild *Aedes* sp. population was evaluated in an urbanized setting, Malaysia. Lethal  
37 ovitraps enhanced with pyriproxyfen were used to control *Aedes* sp. populations at treatment sites,  
38 with the autodissemination activity was assessed using the WHO larval bioassays. Lethal ovitraps  
39 enhanced with pyriproxyfen effectively reduced of *Aedes* sp. population. All autodissemination  
40 stations were shown to be visited by *Aedes* sp. mosquitoes with 100% complete inhibition against  
41 eggs and larvae development. In the larvae bioassay, pupae mortality ranged from 14 to 40%.  
42 Statistically, a significant reduction of *Aedes* sp. population in the treatment sites compared to the  
43 untreated areas. The study proved for the autodissemination of pyriproxyfen to breeding habitats  
44 by wild *Aedes* sp. This technique is highly potentially for vector control activities. Future  
45 evaluation should focus on large-scale field trials.

### 46 **Author Summary**

47 Since 2012, Dataran Automobil, Seksyen 15, Shah Alam, was declared as one of the  
48 dengue hotspot areas. Major vector control activities were conducted by government, NGOs, social  
49 communities, and local authorities, but the number still rising. We conducted a new invention of  
50 autodissemination concepts in this area by an entomological study on mosquito populations

51 reduction and dispersal abilities of the technique. We found that the technique has proven to control  
52 mosquito populations, but the other factors such as epidemiology link still unclear and need further  
53 clarification. Our finding highlighted the effectiveness of autodissemination strategies that can be  
54 considered as one of the alternative tools in vector control programme.

## 55 **Introduction**

56 Dengue fever is a mosquito-borne disease, widely spread all over the world. The primary  
57 vector of dengue transmission is *Aedes aegypti* mosquitoes, while *Ae. albopictus* mosquitoes are  
58 secondary vectors. Both species also transmit yellow fever, zika, and chikungunya infections. Over  
59 the past 50 years, the spread of dengue infection worsened with a 30 times increase in global  
60 incidence cases. The World Health Organization (WHO) estimated around 50 – 100 million  
61 symptomatic dengue infections resulting from about 10,000 deaths annually. This puts half of the  
62 world's population at risk in contracting dengue infection [1]. Dengue infection is considered as a  
63 global issue, with the Asian-Pacific region contributing to 75% of the current dengue cases [2].  
64 The dramatic increase in dengue cases is most probably due to the growth in global human  
65 population as well as the unplanned urbanization of cities around the world. These lead to a rise in  
66 an ideal environment for dengue vectors [3].

67 Currently, there are no commercial vaccines and specific treatments for dengue infection.  
68 Thus, transmission of dengue fever is mainly controlled by prevention through vector control  
69 programs [4, 5]. *Aedes aegypti* and *Ae. albopictus* mosquitoes feed on human blood, typically  
70 active during the day. The immature larvae of these species can be found in a such as tires, artificial  
71 containers, can, bamboo stumps, and leaves. Among the control measures implemented against  
72 these species are through biological strategies (larvivorous fish and copepods), social mobilization,

73 and chemicals [6]. Chemicals used in larvicide and adulticide target different life stages of  
74 mosquitoes. The use of larvicide was found to be more appropriate in controlling mosquito larvae  
75 or pupae. Larvicide targets the aquatic phase of the vectors, making it an advantage in controlling  
76 all the population of mosquitoes. However, the need for frequent application of larvicides at  
77 breeding sites has proven to be a limitation under operational conditions. Insecticides and labor  
78 required for large-scale vector control programs contribute to the significant cost required, which  
79 indirectly decreases the impact of the intervention as the frequency of such activities is low [7-11].  
80 Hence, there remains an urgent need for new tools and strategies to reduce dengue transmission in  
81 a wide range of settings.

82 Pyriproxyfen (PPF) is a juvenile hormone analogue (JHA) that is effectively used in vector  
83 control programs, especially against mosquitoes. It inhibits the physiology of reproduction,  
84 morphogenesis, and embryogenesis of the insects [12]. The highly potent PPF larvicide inhibits  
85 mosquito emergence at a low dose, with no harm to human and non-targeted organisms. No  
86 resistance against pyriproxyfen has been reported in any mosquitoes. Besides, the larvicide activity  
87 of PPF can persist up to six months in different environments. This will affect the egg's  
88 development, reduce the fecundity and fertilities of the eggs, and subsequently sterile the adult  
89 mosquitoes. The novel strategy of using mosquitoes to deliver pyriproxyfen to other breeding sites  
90 has become more interesting. It was first devised by Itoh et al. [13] and was then evaluated and  
91 improvised by other researchers on the coverage of the dissemination, doses used, the  
92 attractiveness of the formulation, and the efficacy of the autodissemination under semi and field  
93 evaluations [14-17]. Therefore, it is vital to identify the abilities of autodissemination of  
94 pyriproxyfen in Malaysia, which may ultimately affect vector control programs against dengue,  
95 zika, and chikungunya.

96           Here, we integrated data obtained from Shah Alam, Selangor, Malaysia, to assess the  
97 potential of pyriproxyfen autodissemination of controlling *Aedes* sp. in endemic dengue hotspots  
98 through monitoring of eggs, larvae and adult emergence in Shah Alam, Selangor. This study  
99 reports on the first experiments undertaken in a small-scale field condition, and we expect that  
100 result from this study will provide a better picture of autodissemination characteristic related to  
101 other parameters and factors.

## 102 **Methods**

### 103 **Study sites**

104 The study area (19°57'05" S, 43°76'88") is an urban area in Shah Alam, Selangor. Dataran  
105 Automobil is located in Seksyen 15, Shah Alam, approximately 10-minutes by car from the Shah  
106 Alam Town Centre six kilometers away (Fig 1). This area consists of eighteen blocks of five-story  
107 shop lot, with each block separated by car parks and small roads. A small river flows down the  
108 side of the buildings with some natural and artificial vegetation shrubbery within the area. Due to  
109 its strategic location, Dataran Automobil is mostly occupied by foreign workers. This area was  
110 declared as a hotspot, with continuous dengue cases reported since 2012. There are multiple car  
111 parks, 24 shop lots, recreational parks, and two dumping sites areas. It is estimated that about 20  
112 to 40% of the residents are immigrants from Nepal, India, Bangladesh, Cambodia, Indonesia, and  
113 China.

114

115

116

117

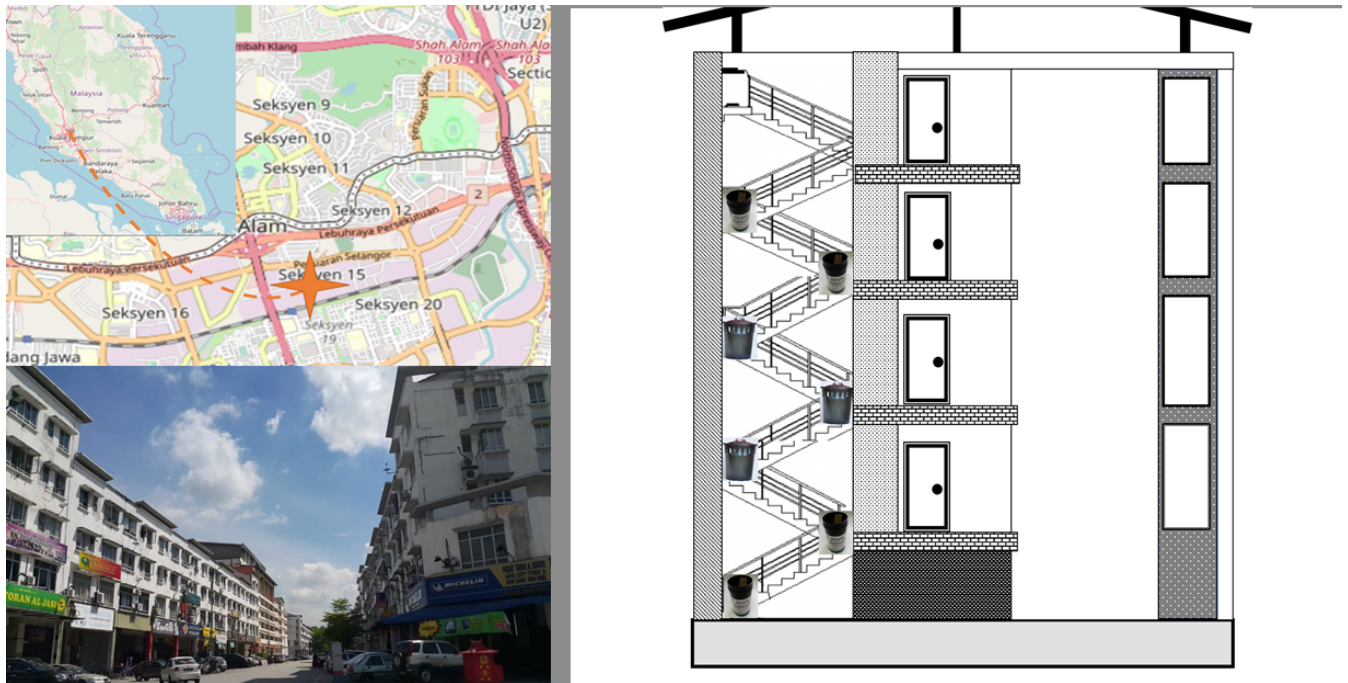

118

119 Fig 1. The location of study area, MHS, and ovitrap placement in Dataran Automobil, Seksyen  
120 15, Shah Alam. The maps were obtained from U.S Geological; Survey, National  
121 Geospatial Program (<https://glovis.usgs.gov/app?fullscreen=0>; browsed on 4 January  
122 2020) and the building photo was from courtesy of Ahmad Mohiddin.

### 123 **Mosquito Home Autodissemination**

124 The Mosquito Home Autodissemination (hereafter referred as MHS) trap used for this research is  
125 described elsewhere [18]. Briefly, the device is a black polyethylene flowerpot with ten openings  
126 at the top of the device. The autodissemination device measured about 19.7cm (height) x 14.6 cm  
127 (diameter) in size. The application dosage of pyriproxyfen treated water is 0.004% w/w supplied  
128 by One Team Network, Sdn Bhd. The solution was tested in a room assay by the Vector Control  
129 Research Unit (VCRU), Universiti Sains Malaysia, by using oviposition cups and showed 100%  
130 mortality against all larvae in the experiments. During the trials, oviposition sites were placed in

131 control and treatment sites, and autodissemination devices were only deployed in treatment sites.  
132 Autodissemination devices were serviced fortnightly to ensure all functions were working,  
133 sufficient water solution treatment, and removal of any clogged devices.

134

### 135 **Study Design**

136 The trial procedure was slightly modified from previous protocols [19-21]. The study was  
137 conducted for duration of 9 months at Dataran Automobil, Seksyen 15, Shah Alam. The trial  
138 consists of two months prior to PPF dissemination, six months of citywide PPF dissemination, and  
139 one-month post-PPF dissemination. Initially, conventional ovitraps were deployed for the trials.  
140 The ovitrap was observed at weekly intervals, and larvae were identified to species to determine  
141 the ratio of *Aedes* sp. The data will provide the size of *Aedes* sp. population within the study area.  
142 In the third month, the Mosquito Home System (MHS) is deployed to selected treatment areas for  
143 six months. Following the MHS deployment, conventional ovitraps were placed in between MHS  
144 traps at a distance interval range of 1 – 5 meters within access of the *Aedes* population. The larvae  
145 density and ratio of *Aedes* sp. were recorded continuously until the end of the trials.

### 146 **Ovitrap Surveillance**

147 A total of 160 oviposition cups (12 x 4 treatment sites, 12 x 4 control sites) (Fig 1) were placed at  
148 the stairways of eight blocks, along with the second and fourth levels. Ovitrap technique with  
149 paddles was used to monitor the *Aedes* populations and changed weekly as required [22]. Each  
150 ovitrap cup was coded individually with labels to ensure it is placed at the same location in each  
151 sampling round. Any missing ovitrap or paddle was replaced with a new one. The ovitraps were  
152 taken to the laboratory separately, and water from the ovitrap will be transferred to an enamel pan.

153 All the larvae were identified using the Entomological Charts for Teaching provided by the Unit  
154 of Medical Entomology, Institute Medical Research (IMR), Kuala Lumpur.

### 155 **Intervention**

156 A total of 150 MHS devices were deployed in four blocks on all stairways. Three  
157 autodissemination devices were placed diagonally clustering around each trap on the third floor.  
158 Autodissemination devices were one to five meters from the nearest ovitrap. Autodissemination  
159 device deployment took place from January 2018 to June 2018, coinciding with the rainy season.  
160 All MHS devices were removed from the field at the end of month eight. MHS was checked  
161 fortnightly throughout the six months of the trials to refill the solution and replace any loss on  
162 MHSs.

### 163 **Activity of pyriproxyfen in the field**

164 All field samples from ovitrap and autodissemination devices (MHS) were brought back to the  
165 laboratory and then filtered to remove organic debris and wild mosquito populations. From each  
166 sample, 200ml water was transferred into a bioassay cup to determine pyriproxyfen activity.  
167 Twenty laboratory-reared third instars larvae were exposed to the field samples following larval  
168 bioassay procedure as described above. Pupal mortality, abnormal morphology, or coloration was  
169 recorded to show pyriproxyfen activity in the field samples. In some specimens, the  
170 contaminations of pyriproxyfen increased the larval development time of typically 8-9 days up to  
171 two weeks and subsequently causing death in the pupae stages.



172 **Pyriproxyfen bioassays**

173 **Mosquito rearing.** Larvae of *Ae. aegypti* were obtained from a colony established at the  
174 Laboratory of Institute of Medical Research. Mosquito was reared, as described by Mohiddin et  
175 al. [23]. Larvae were fed with Tetramin© fish food and adult mosquitoes were fed with 10% of  
176 sucrose solutions.

177 **Larval bioassay.** Larval bioassay was conducted to assess the impact of pyriproxyfen on the field  
178 according to the WHO guidelines [24]. From ovitrap containers, 200ml of water samples were  
179 used for the study. The water samples were then tested with three different points of time- before,  
180 ongoing and after the treatment. All larvae bioassays were performed using late third instar larvae  
181 of *Ae. aegypti*. For the negative control, three cups were set up using tap water and 20 larvae per  
182 bioassay. Control treatments were treated with 199ml tap water and 1ml of ethanol. The mortality  
183 was recorded every 48h until the emergence of adult, while the larvae were also provided with  
184 food daily. Experiments were conducted at temperature of  $26\pm 2^{\circ}\text{C}$  and  $60\pm 20\%$  RH and preferably  
185 a photoperiod of 12h light followed by 12h dark.

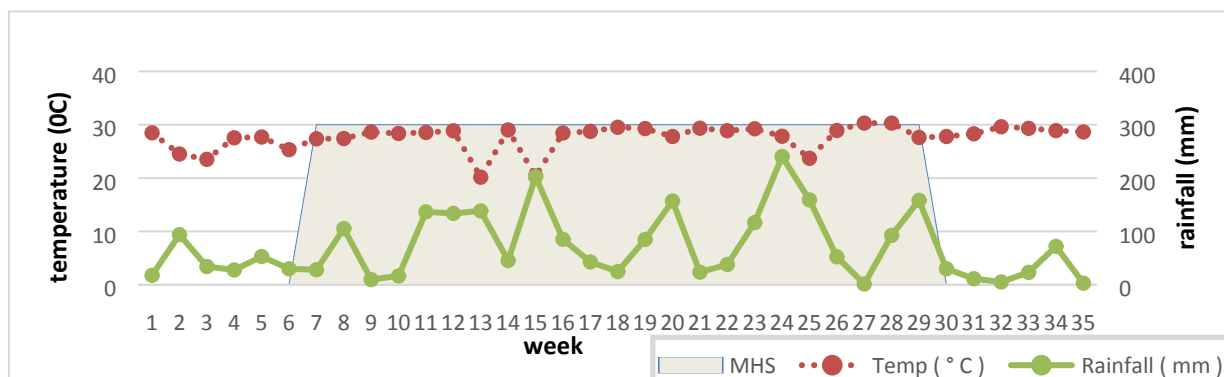

186 Fig 2. Weather variables of temperature (dashed line) and rainfall (solid line) obtained from  
187 the Dataran Automobil, Seksyen 15, Shah Alam.

188 **Meteorological parameter.** Data were collected within the same period of larval collection,  
189 starting from November 2017 to June 2018. Climatic data were obtained from the Malaysian  
190 Meteorological Department, Petaling Jaya station. The weekly means for rainfall and mean  
191 temperature in Shah Alam, Selangor, is shown in Fig 2.

## 192 **Data Analysis**

193 The abundance of *Aedes* sp. mosquito populations was assessed using the positive ovitrap index,  
194 mean eggs per trap, and standard error were computed. The relationship between the  
195 meteorological variable and the number of *Aedes* sp. population was assessed with Pearson's  
196 correlation coefficient. Pearson's correlation coefficient was then used to express the correlation  
197 between the mean number of eggs collected from MHSs, percentage positive cup and percentage  
198 of pupae mortality. Pearson's correlation coefficient test was also used to detect correlations  
199 between climatic factor and entomological parameter (number of eggs, larva) with a significant  
200 level set at 0.05. A generalized linear model (GLM) with Poisson distribution was carried out to  
201 compare the number of larvae population obtained from the ovitrap in treated and untreated areas.  
202 The response variables were the number of larvae populations of *Aedes* sp. mosquitoes. Site of the  
203 traps (1; if contained autodissemination and, 0; other), week and interaction of the week\*site  
204 trapping act as predictors. As the time of sampling period was fixed, no offset was used. All  
205 statistical analysis in these studies was performed with Statistical Package for the Social Science  
206 (SPSS) version 23.

207

208

209

## 210 Results

### 211 Descriptive analysis of entomological data

212 A total of 113, 877 larvae mosquito were collected from Dataran Automobil Shah Alam in the 35  
213 weeks (December 2017 to August 2018). *Ae. aegypti* represented 99.66% of all mosquitoes  
214 collected (*Ae. albopictus* was the only other mosquitoes observed). This species was encountered  
215 at both treatment and control sites. In treatment and control sites, 99.88% and 99.43% *Aedes* sp.  
216 larvae were identified as *Ae. aegypti*, respectively (Table 1). Furthermore, the mean number of  
217 larvae collected was slightly lower in treatment (1602.51±1077.56) compared to the control sites  
218 (1651.11±1031.99). On the other hand, the mean number of *Ae. albopictus* larvae were higher in  
219 treatment (2.27±0.84) than in the control sites (0.49±0.48).

220 Table 1. The overall number of *Ae. aegypti* and *Ae. albopictus* collected from control and  
221 treatment sites.

| Sites     | Total cup<br>(positive) | <i>Ae. aegypti</i> |       |              | <i>Ae. albopictus</i> |      |           |
|-----------|-------------------------|--------------------|-------|--------------|-----------------------|------|-----------|
|           |                         | No. of larvae      | %     | Mean ± SD    | No. of larvae         | %    | Mean ± SD |
| Control   | 1539                    | 57721              | 99.88 | 412.30±25.26 | 68                    | 0.12 | 0.49±0.48 |
| Treatment | 1623                    | 55769              | 99.44 | 398.35±24.87 | 319                   | 0.56 | 2.27±0.84 |

222

223 The number of single and mixed breeding among the *Aedes* sp. population in treatment and control  
224 sites were compared (Table 2). The mixed breeding of *Ae. aegypti* larvae were 1.96% and 6.8%  
225 obtained from control and treatment sites, respectively. The number of *Ae. albopictus* in mixed  
226 containers were 6.0 to 11.0 fold lower than *Ae. aegypti* species. Additionally, there was no

227 significant difference ( $p=0.803$ ) between mixed breeding sites to the mean number of larvae of  
 228 these species in the treatment and control sites.

229 Table 2. Distribution of *Aedes* sp. based on single and mixed breeding sites from treatment and  
 230 control areas.

| Sites                  | Single breeding    |       |                    |                       |   |               | Mixed breeding |      |                    |
|------------------------|--------------------|-------|--------------------|-----------------------|---|---------------|----------------|------|--------------------|
|                        | <i>Ae. aegypti</i> |       |                    | <i>Ae. albopictus</i> |   |               | No. of larvae  | %    | Mean $\pm$ SD      |
|                        | No. of larvae      | %     | Mean $\pm$ SE      | No. of larvae         | % | Mean $\pm$ SD |                |      |                    |
| Control                | 56853              | 98.38 | 411.98 $\pm$ 25.62 | 0                     | 0 | 0             | 936            | 1.62 | 468 $\pm$ 22       |
| Treatment              | 52276              | 93.21 | 408.41 $\pm$ 26.87 | 0                     | 0 | 0             | 3812           | 6.79 | 317.67 $\pm$ 35.56 |
| Student <i>t</i> -test | P<0.005            |       |                    | nil                   |   |               | P=0.803        |      |                    |

231

### 232 **Influence of meteorology parameters/ Description temporal**

233 To understand the role of meteorological factors on *Aedes* sp. populations, the rainfall data and  
 234 temperature were extracted from the study sites. Pearson's correlation analysis showed a low  
 235 association between the parameters selected. However, all parameters used in study areas did not  
 236 show any significant associations between the meteorological and entomological parameters used  
 237 (Table 3)

238

239

240

241

242 Table 3. Pearson correlation analysis between entomological parameters and meteorological data

| Meteorological<br>parameter | Entomological data |               |               |             |                      |
|-----------------------------|--------------------|---------------|---------------|-------------|----------------------|
|                             | Rainfall           | Ovitrap index | No. of larvae | No. of eggs | No. of eggs<br>(MHS) |
| Rainfall                    | 1                  | -0.032        | -0.019        | -0.119      | 0.236                |
| Temperature                 | -0.431**           | -0.126        | 0.276         | 0.128       | 0.101                |

243 \*\* denote significant correlations at the 0.05 and 0.01 significant levels.

#### 244 **Impact of the autodissemination approach on the small-scale field**

245 **Autodissemination device (MHS).** The small-scale field evaluation provided information  
246 regarding the direct impact of pyriproxyfen on Aedes mosquito population. From the study, none  
247 of the larvae collected from autodissemination device solution emerged into adult. This result also  
248 showed 100% mortality against larva during the bioassay under laboratory conditions.

249

250 **Ovitrap.** Autodissemination of pyriproxyfen was detected in water collected from the ovitraps of  
251 the small-scale field trials. During the trials, the overall mortality of the pupa was  $27.01 \pm 1.8\%$ .  
252 Pupal mortality was  $28.07 \pm 4.42\%$  in week one post-treatment and was consistent during the trials  
253 and reached a peak in week 24 with  $42.63 \pm 11.46\%$ . A slight reduction in mortality was seen in  
254 week 12 ( $14.61 \pm 2.03$ ). A different mean number of eggs collected from ovitraps during the study  
255 period ranges from 60.66 to 119.62 eggs per cup. The percentage mortalities of larvae showed a  
256 positive association with the mean number of eggs collected from MHS ( $r = 0.001$ ) and with the  
257 positive cup of pyriproxyfen ( $r = 0.238$ ) (Fig 3). The higher number of eggs was related to the  
258 resting periods during the egg-laying, which ultimately enhances the possibilities to transfer more  
259 insecticide to other containers, thus increasing the number of mortalities against the larvae.

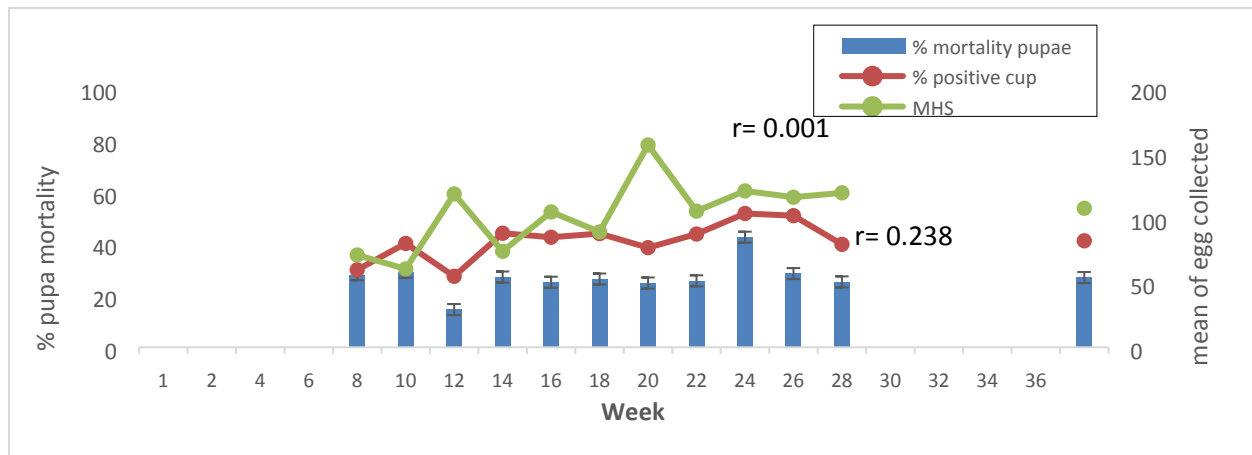

260  
261 Fig 3. Pupa mortality percentage, % of positive cup and eggs collected by MHSs by week in  
262 treated sites

263

264

265

266 Table 4 *Aedes* sp. larvae abundance in treated and untreated sites using the Generalized Linear  
267 Model.

| Term           | Estimate | SE     | 95% CI |       | Pr(> z ) |
|----------------|----------|--------|--------|-------|----------|
| Intercept      | 7.248    | 0.0171 | 7.215  | 7.282 | <0.0001  |
| Treatment      | -0.812   | 0.0255 | -0.862 | 0.762 | <0.0001  |
| Week           | 0.009    | 0.0009 | 0.008  | 0.011 | <0.0001  |
| Treatment*week | 0.042    | 0.0013 | 0.040  | 0.045 | <0.0001  |

268 Number of sampling:70, no. of week: 35, SE: standard error, Pr(|z|): statistic for z-value. ovitrap index as reference  
269 level.

270 The Generalized Linear Model (GLM) with Poisson distribution used to analyze the data showed  
271 that the experiment's sites are significantly predictors of the mean number of larvae ( $p<0.0001$ ).  
272 The larvae populations were higher in the untreated sites compared to the treated sites during the  
273 implementation of autodissemination station. Unexpectedly, a significantly positive relationship  
274 between other predictors was observed ( $p<0.0001$ ) (Table 4). Reduction in the number of larvae  
275 was observed in the early period of autodissemination deployment, constantly below untreated  
276 sites throughout the study period, with variations due to other factors (**Figure 4**).

277

278

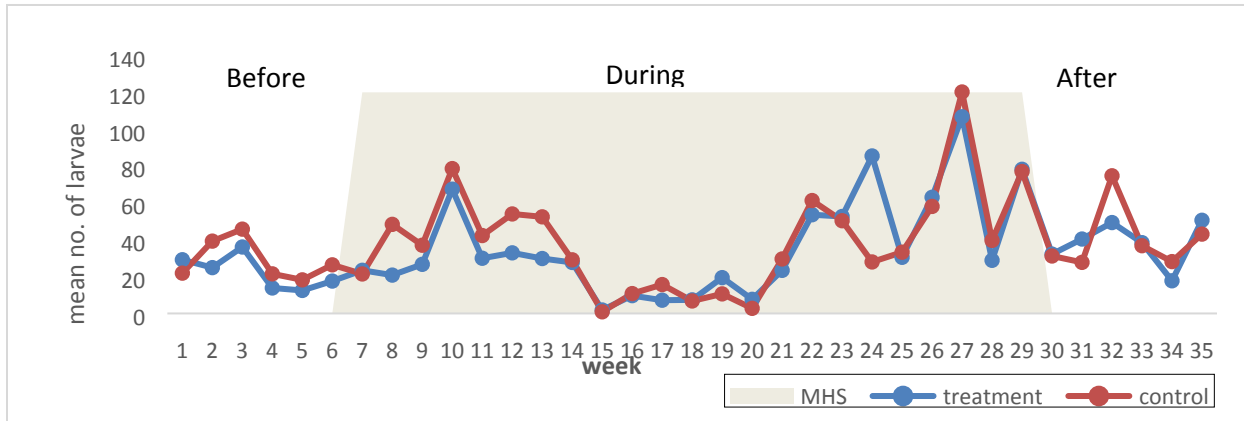

279

280 Fig 4. Larval population-based on autodissemination deployment in treated and untreated sites.

## 281 Discussion

282 This study is designed to assess the situation of a dengue epidemic area in Shah Alam, Malaysia,  
283 and investigate the effect of an autodissemination approach for vector control. The area was  
284 evaluated with entomological surveillance and climatic factors, while the autodissemination  
285 activity was assessed using the WHO larval bioassays. To the authors' knowledge, no study has  
286 been conducted in Malaysia to determine the efficacy of an autodissemination approach under  
287 small-scale field trials. This approach has shown promising potential in reducing *Aedes* sp.  
288 population and thus improving vector control management during outbreaks, particularly in urban  
289 settings.

290 In the present study, using ovitrap technique, 118,391 eggs and 113,887 larvae were  
291 collected from the trial sites. *Ae. aegypti* was the predominant species found in almost all the  
292 treated and untreated sites. The ovitrap technique was found to assess the distribution and  
293 abundance of *Ae. aegypti* and *Ae. Albopictus* effectively, especially in areas with low frequencies  
294 of mosquito population. Ovitrap are widely used as large-scale monitoring concerning public



295 health as they are inexpensive, easy to handle and highly sensitive compared to other techniques  
296 [25-26]. A large number of eggs and larvae found in this study could be due to the ideal  
297 environment surrounding Dataran Automobil in Shah Alam. Hence, the finding could be related  
298 to the larva-positive water tank, unmanaged rooftop structures, air-well design containing bottles,  
299 cups and plastic bags that provide suitable breeding conditions for *Aedes* sp. Other studies have  
300 also found that the poor design of rooftops and floors contributes towards a high number of  
301 breeding sites [27-28]. Recently, Garcia-Sanchez et al. [29] reported a water-tank containing  
302 detritus and planktonic organisms to be positive of mosquito larvae. The richness of bacterial  
303 community in the water-storage is directly/indirectly used as indicators for the presence of  
304 mosquitoes [30]. However, other factors should be taken into accounts, such as meteorological  
305 factors, vector control activities, and human activities. These factors taken together should be  
306 incorporated in dengue outbreak control programs.

307         Based on our analysis using data collected by mosquito population monitoring approaches,  
308 climatic factors may also contribute to the changes of mosquito population in the environment.  
309 Climatic factors are essential to the dynamics of mosquitoes in the epidemiological trend related  
310 to the transmission of diseases [31]. Temperature is usually associated with the effects on the  
311 viability of egg, larval development, longevity, and adult dispersal, whereas rainfalls affect the  
312 productivity of the mosquitoes and abundance of the species [32-33]. In San Luis, Brazil, the  
313 rainfall and three months' lag of precipitation positively correlate with dengue cases reported [34].  
314 Other findings with three different models show high significance between rainfall and *Aedes*  
315 populations [35]. Barrera et al. [36] found that adjusted rainfalls were also significantly and  
316 positively related to the number of adult mosquitoes collected from traps.

317 We also observed that temperature is an important variable in determining the *Aedes* sp.  
318 populations. Our findings show a positive association between temperature and the number of  
319 *Aedes* sp based on Pearson's correlations analysis. Tsai et al. [37] found that critically low (as low  
320 as 13.8°C) and higher temperatures may decrease the mosquito populations, with regards to the  
321 mosquito's fertility and longevity [38]. Other studies on diurnal temperature found a significant  
322 interaction between larval density and temperature settings. This could be due to the fluctuations,  
323 larval density and low-volume container parameters in predicting the effects. Although each factor  
324 individually influences the *Aedes* mosquito population, interaction between various factors will  
325 have a more significant impact on the final proportion of the mosquitoes [39-40]. The  
326 mathematical model of temperature transmission was used to integrate the data obtained from the  
327 laboratory tests. The results show that the highest peak of mosquito abundance with high  
328 transmission was suggested at 26°C to 29°C; however, transmission can also occur between 18°C  
329 to 34°C [41]. Similarly, like other findings [42], our results suggest that both temperature and  
330 rainfall are more likely to drive an additional change in mosquito populations, as well as a possible  
331 expansion in habitat for urban mosquitoes.

332 A high number of *Aedes* sp. populations in the environment may increase the probability  
333 of dengue transmission. A model was developed to estimate the abundance of mosquitoes in  
334 communities with their impact against dengue cases. The results demonstrated a definite risk of  
335 transmission resurgence due to the number of mosquito populations. However, the actual risk  
336 depends on the probabilities of uninfected people arriving at the right time of the year, where the  
337 mosquito population is at its peak with vectorial competence [43]. Most of the studies conducted  
338 relate the entomological indices with the number of cases and other related factors [44-46]. A study  
339 in Thailand investigated the relationship between sensitivity of entomological indices and

340 immunological indicators in sites of treated and untreated areas [47]. Comprehensive research on  
341 mosquito abundance and dengue virus infection was also conducted in Peru. However, the results  
342 were not sensitive enough to detect any small changes in the transmission [48]. Ahmad et al. [49]  
343 agreed that high frequency of vector population control based on entomological indices results in  
344 a significant relationship between epidemiological and entomological parameters. It is crucial to  
345 expect high number of dengue cases in area with high density of *Aedes* sp. population and  
346 necessary preventive actions should be taken to avoid occurrence of dengue outbreaks.

347 Malaysia's current vector control strategies still rely on conventional methods, which focus  
348 on thermal fogging, ultra-low volume spraying, larviciding, source reduction and enforcement  
349 activities [50]. Most of these strategies are not capable in solving the problem, which is primarily  
350 caused by larvae of *Aedes* sp. mosquitoes. Although thermal fogging eliminate adult mosquitoes,  
351 their progenies are still viable in breeding sites elsewhere. Unfortunately, most insecticide used  
352 for fogging has one-way effects [51]. In some areas, larviciding is the most appropriate method to  
353 control *Aedes* sp. population. However, workers often cannot find cryptic and hidden breeding  
354 sites during surveillance [52]. Based on these issues, new paradigms in vector control are required.  
355 An effective control measure against *Aedes* sp. mosquitoes is in need, which will be able to  
356 specifically target adult, larvae and cryptic breeding habitats of mosquitoes.

357 The autodissemination approach has become one of the most interesting methods to  
358 combine with other vector control strategies. The effectiveness of autodissemination is highly  
359 dependent on the *Aedes* sp. working as a form of transportation to disseminate insecticide to other  
360 breeding sites, in line with their "skip-oviposition" behavior [53-54]. In our study, all  
361 autodissemination stations were shown to be visited by *Aedes* sp. mosquitoes with 100% complete  
362 inhibition against eggs and larva development. Thus, MHS could be exploited to provide an index

363 similar to other techniques (such an ovitrap) as it also assesses the percentage of positive breeding  
364 sites. However, results obtained from MHS containers are unable to calculate any mortality rates  
365 among the larvae as the eggs or first instar stage dies due to pyriproxyfen effects. Due to the new  
366 fortnightly setup of MHS formulation, we did not proceed with further evaluation against the  
367 mortality or any residual effect of the solutions. A commercial formulation of MHS with 0.004%  
368 active ingredient is lower than the concentrations used in other studies against dengue and malaria  
369 vectors.

370 The egg hatching rate is dose-dependent against insect growth regulators such as  
371 pyriproxyfen, diflubenzuron, and azadirachtin. Pyriproxyfen is considered as an ovicidal agent,  
372 especially on freshly laid eggs, which are more vulnerable and more sensitive than diapause eggs  
373 [55]. Suman et al. [56] found that higher concentration of pyriproxyfen exposure will significantly  
374 kill newly deposited and fully embryonated eggs. The hatching rate under non-diapausing  
375 conditions between newly deposited and fully embryonated eggs ranged from 1.0 to 1.8% against  
376 1ppm pyriproxyfen. The efficacy of autodissemination traps does not rely on the hatching rate of  
377 larvae, considering the mortality rate as well as the presence of larvicides or insecticides. This  
378 finding was consistent with our result, whereby 100% larvae were killed and no emergence into  
379 adult was observed when we used 40ppm pyriproxyfen. Pyriproxyfen induced morphological  
380 abnormalities in *Aedes* sp. non-diapause embryos, leading to ovicidal effects. However, the  
381 mechanism of pyriproxyfen on egg diapauses in mosquitoes is still unclear [56-57].

382 For a system to have an autodissemination concept, it needs to have the ability to transfer  
383 the chemicals from the station to other breeding sites [17]. During our study, we were able to  
384 demonstrate the autodissemination concept of wild *Aedes* sp. mosquitoes, where pyriproxyfen  
385 solution from MHS station was disseminated to other breeding sites (ovitrap). Surprisingly, we

386 found promising results as pupal mortality ranged from 14% to 40%, perhaps due to the placement  
387 of MHS autodissemination station in the study areas as well as the structure of the buildings. Most  
388 of the autodissemination stations and ovitraps were placed about two to five meters from each  
389 other. The autodissemination placement increased the chances of exposed mosquitoes to transfer  
390 a sufficient amount of pyriproxyfen to other larval habitats before the formulation evaporates [57-  
391 58]. Therefore, our autodissemination stations were the first and primary oviposition sites for  
392 mosquitoes, most of which were coming from the entrance of the buildings.

393         Semi-field and field trials have shown that *Aedes* sp. can transfer pyriproxyfen from treated  
394 containers to the other larval oviposition sites with a high range of emergence inhibition rates on  
395 the mosquitoes. Several factors might explain the results of this study. Suman et al. [14] obtained  
396 50.4% pupal mortality against *Ae. albopictus* with dissemination range up to 200m distance in  
397 residential areas. Similarly, Lloyd and colleagues [53], also reported autodissemination activities  
398 assessed 200m from the autodissemination vases and can be effectively used for five weeks against  
399 *Ae. albopictus* larvae. Thus, it is likely that most studies use a large amount of pyriproxyfen to  
400 increase the impact of autodissemination under semi and field conditions [13-17, 59-60]

401

402         Additionally, we found a positive relationship between the number of eggs collected in  
403 autodissemination station (MHS) with percentage of a positive cup ( $r=0.238$ ) and percentage of  
404 pupa mortality ( $r=0.001$ ). Based on the findings by Chism and Apperson [61], the number of pupal  
405 mortality may have an association with the residence time during the egg-laying activities. The  
406 longer the time it took for mosquitoes to lay their eggs, the higher the amount of pyriproxyfen  
407 carried and transferred to other containers, thus increasing pupal mortality rate. A good  
408 relationship was obtained from various field trials with the percentage of pupal mortality and

409 proportion of sentinel contamination to positively correlation ( $r=0.6$ ) between the parameters [14].  
410 Our recent finding through mathematical modeling and simulation found out that a sufficient  
411 number of MHS placed in the study area could reduced dengue cases up to 91% [62]. This  
412 indicates that the autodissemination station and Mosquito Home AQ used in this study have good  
413 potential in attracting wild mosquitoes and subsequently disseminate pyriproxyfen to other  
414 containers under natural environments.

415         Based on our results, there is no clear indicator of the reduced number of *Aedes* sp.  
416 population during the treatment period. However, pupa mortality during the laboratory bioassays  
417 and negative correlations were observed against eggs and larva densities throughout the  
418 deployment of autodissemination devices. Thus, the fluctuated trends of ovitrap index, larval and  
419 egg populations were observed at both treated and untreated sites. We noted that our trial is located  
420 in the middle of the city with high range of mosquito populations. High frequencies of mosquitoes  
421 from adjacent and other areas may freely migrate to the treated areas. These mosquitoes may  
422 potentially replace the local mosquito population [63], thus laying their eggs inside the ovitrap as  
423 their first choice before they reach any autodissemination station.

424         The occurrence of various factors has limited our ability to investigate a broader aspect  
425 against the local mosquito population. Additionally, incoming mosquitoes may also play an  
426 important role in increasing the coverage of pyriproxyfen dissemination, which, unfortunately,  
427 may lead to failure of certain experiments [64]. Oviposition preference of mosquitoes brings a  
428 complex implication in understanding local populations following usage of a new formulation of  
429 pyriproxyfen with a potent attractant developed by the manufacturer. Some studies report that  
430 *Aedes* sp. mosquitoes express oviposition behavior for specific types of attractants, such as bamboo  
431 leaf infusions [65], octenol [66] and yeast-produced CO<sub>2</sub> [67]. These types of substrates should be

432 taken into account when autodissemination stations are used as they may enhance the success rate  
433 of insecticide transference. Furthermore, all aspects of oviposition substrates that act as breeding  
434 site cues should be further explored to improve the efficacy of the stations.

## 435 **Conclusion**

436 Result of the present work is consistent with other studies conducted on the effectiveness  
437 of an autodissemination approach based on pyriproxyfen treatment, either in the semi or field trials.  
438 This suggests that intervention based on the autodissemination technique may affect (depending  
439 on the site of applications) in reducing *Aedes* sp. population and, subsequently, inhibit the  
440 transmission of dengue viruses. Thus, this is the first pilot study to investigate the potential usage  
441 of an autodissemination approach for dengue control programme in Malaysia. We found that wild  
442 mosquitoes can transfer pyriproxyfen to other larval breeding containers, thus reducing *Aedes* sp.  
443 population. The effectiveness of autodissemination approach was also affected by various factors  
444 such as type of treatment either direct or autodissemination, coverage of the treatment, type of  
445 pyriproxyfen, geographical and meteorological parameters. However, before this approach can  
446 potentially be used, further studies are needed to improve the autodissemination efficacy,  
447 especially on formulation development, including mark-release-recaptured (MRR) trials to  
448 understand the dispersal and migration pattern of the mosquitoes prior to population reduction  
449 under field conditions.

## 450 **Acknowledgments**

451 The authors are grateful to One Team Networks Sdn Bhd for providing necessary equipment and  
452 assistance during the field experiments. We would also like to thank Farihan from Universiti  
453 Kebangsaan Malaysia and Khadijah from Pejabat Kesihatan Daerah Petaling for providing

454 mosquitoes for laboratory experiments. This research was partially supported under the Dengue  
455 Tech Challenge 2016 Grant, under the Newton-Ungku Omar Fund Partnership  
456 (AIM/PlaTCOM/HIP2/CCGF/2016/088).

457

## 458 **Authors contributions**

459 NWA, HFO, LHL and AMMN conceived the idea, developed the design and protocol for this  
460 research. AMMN and RB performed data collection and experiments. AMMN, YL, DG, AML  
461 and TO analysed the data. HFO, MS and RH supervised the study. AMMN draft the original  
462 manuscript. HFO, NWA, JCSM, YL, DG review and editing manuscript to final form. All authors  
463 read and approved the final version of the manuscript.

## 464 **Competing interest**

465 The authors declare there are no competing interests.

## 466 **References**

- 467 1. Stanaway JD, Shepard DS, Undurraga EA, Halasa Ya, Brady OJ, Hay SI, et al. The global  
468 burden of dengue: an analysis from the global burden of disease study 2013. *Lancet Infect*  
469 *Dis.* 2016; 16(6): 712-723. doi: 10.1016/S1473-3099(16)00026-8.
- 470 2. WHO Regional Office for South-East Asia. *Comprehensive Guidelines for Prevention and*  
471 *Control of Dengue and Dengue Haemorrhagic Fever, Revised and Expanded Edition.* New  
472 Delhi: World Health Organization South East Asia Regional Office; 2011.
- 473 3. Murray NE, Quam MB, Wilder-Smith A. Epidemiology of dengue: past, present and future  
474 prospects. *Clin Epidemiol.* 2013; 5: 299-309. doi: [10.2147/CLEP.S34440](https://doi.org/10.2147/CLEP.S34440)



- 475 4. Lindsay SW, Wilson A, Golding N, Scott TW, Takken W. Improving the built environment  
476 in urban areas to control *Aedes aegypti*-borne diseases. Bull World Health Organ. 2017;  
477 95: 607-608. doi: [10.2471/BLT.16.189688](https://doi.org/10.2471/BLT.16.189688)
- 478 5. Dieng H, Ellias SB, Satho T, Ahmad AH, Abang F, Ghani IA, Noor S, Ahmad H, Zuharah  
479 WF, Morales Vargas RE, Morales NP, Hipolito CN, Attrapadung S and Noweg GT.  
480 Coffee, its roasted form, and their residues cause birth failure and shorten lifespan in  
481 dengue vectors. Environ Sci Pollut Res Int. 24(17):14782-14794 (2017). doi:  
482 10.1007/s11356-017-8711-4
- 483 6. Rather IA, Hilal AP, Jameel BL, Woon KP, Jeongheui L, Vivek KB, Yong-Ha P.  
484 Prevention and control strategies to counter dengue virus infection. Front Cell Infect  
485 Microbiol. 2017; 7: 336. doi: [10.3389/fcimb.2017.00336](https://doi.org/10.3389/fcimb.2017.00336)
- 486 7. Fitzpatrick C, Haines A, Bangert M, Farlow A, Hemingway J, Velayudhan R. An economic  
487 evaluation of vector control in the age of a dengue vaccine. PLoS Negl Trop Dis. 2017;  
488 11(8): e0005785. doi: [10.1371/journal.pntd.0005785](https://doi.org/10.1371/journal.pntd.0005785)
- 489 8. Toledo ME, Vanlerberghe V, Rosales JP, Mirabal M, Cabrera P, Fonseca V, Padron TG,  
490 Menzies MP, Montada D, Stuyft PV. The additional benefit of residual spraying and  
491 insecticide-treated curtains for dengue control over current best practice in Cuba:  
492 evaluation of disease incidence in a cluster randomized trial in a low burden setting with  
493 intensive routine control. PLoS Negl Trop Dis. 2017; 11(11): e0006031. doi:  
494 10.1371/journal.pntd.0006031
- 495 9. Packierisamy PR, Ng CW, Dahlui M, Inbaraj J, Balan VK, Halasa YA, Shepard DS. Cost  
496 of dengue vector control activities in Malaysia. 2015. Am J Trop Med Hyg; 93(5): 1020-  
497 1027. doi: [10.4269/ajtmh.14-0667](https://doi.org/10.4269/ajtmh.14-0667)

- 498 10. Pepin KM, Toledo CM, Scherer L, Morais MM, Ellis B, Eiras AE. Cost-effectiveness of  
499 novel system of mosquito surveillance and control, Brazil. *Emerging Infectious Diseases*.  
500 2013; 19(4): 542-550. doi: 10.3201/eid1904.120117
- 501 11. Azil AH, Ritchie S, Williams CR. Dengue vector surveillance methods: factors that  
502 determine perceived ease, difficulty, value, and time effectiveness in Australia and  
503 Malaysia. *Asia Pacific J Public Health*. 2015; 27(7): 705-14. doi:  
504 10.1177/1010539514548760
- 505 12. Invest JF, Lucas JR. Pyriproxyfen as a mosquito larvicide. In: Robinson WH, Bajomi D,  
506 eds. *Proceedings of the 6<sup>th</sup> International Conference on Urban Pests*. July 13-16; Budapest,  
507 Hungary. Veszprem Papai, Hungary. OOK-Press KFT: p239-245
- 508 13. Itoh T, Kawada H, Abe A, Eshita Y, Rongsriyam Y, Igarashi A. Utilization of bloodfed  
509 females of *Aedes aegypti* as a vehicle for the transfer of the insect growth regulator,  
510 pyriproxyfen, to larval habitats. *J Am Mosq Control Assoc*. 1994; 10(3): 344-7
- 511 14. Suman DS, Wang Y, Faraji A, Williams GM, Williges E, Gaugler. Seasonal field efficacy  
512 of pyriproxyfen autodissemination stations against container-inhabiting mosquito *Aedes*  
513 *albopictus* under different habitat conditions. *Pest Manag Sci*. 2018; 74(4): 885-895. doi:  
514 10.1002/ps.4780
- 515 15. Abad-Franch F, Zamora-Perea E, Ferraz G, Padilla-Torres SD, Luz SLB. Mosquito-  
516 disseminated pyriproxyfen yields high breeding-site coverage and boosts juvenile  
517 mosquito mortality at the neighbourhood scale. *PLoS Negl Trop Dis*. 2015; 9(4):  
518 e0003702. doi: 10.1371/journal.pntd.0003702

- 519 16. Devine GJ, Zamora-Perea E, Killeen GF, Stancil JD, Clark SJ, Morrison AC. Using adult  
520 mosquitoes to transfer insecticide to *Aede aegypti* larval habitats. PNAS. 2009; 106(28):  
521 11530-11534. doi: 10.1073/pnas.0901369106
- 522 17. Gaugler R, Suman D, Wang Y. An autodissemination station for the transfer of an insect  
523 growth regulator to mosquito oviposition sites. Med Vet Entomol. 2011; 26(1): 37-45. doi:  
524 10.1111/j.1365-2915.2011.00970.x
- 525 18. Greenhalgh D, Liang Y, Nazni WA, Teoh G, Lee HK, Massad Eduardo. Modelling the  
526 effect of a novel auto-dissemination trap on the spread of dengue in high-rise condominiums,  
527 Malaysia. J Biol Syst. 2018; 26(4): 553-578
- 528 19. Unlu I, Suman DS, Wang Y, Klinger K, Faraji A, Gaugler R. Effectiveness of  
529 autodissemination stations containing pyriproxyfen in reducing immature *Aedes albopictus*  
530 populations. Parasites & Vectors. 2017; 10: 139. [https://doi.org/10.1186/s13071-017-](https://doi.org/10.1186/s13071-017-2034-7)  
531 2034-7
- 532 20. Caputo B, Ienco A, Cianci D, Pombi M, Petrarca V, Baseggio A, Devine GJ, Torre AD.  
533 The “auto-dissemination” approach: a novel concept to fight *Aedes albopictus* in urban  
534 areas. PLoS Negl Trop Dis. 2012; 6(8): e1793. doi: 10.1371/journal.pntd.0001793
- 535 21. Suman DS, Farajollahi A, Healy S, Williams GM, Wang Y, Schoeler G, Gaugler R. Point-  
536 source and area-wide field studies of pyriproxyfen autodissemination against urban  
537 container-inhabiting mosquitoes. Acta Tropica. 2014; 135: 96-103. doi:  
538 10.1016/j.actatropica.2014.03.026
- 539 22. Vector Disease Branch. Protocol for surveillance and monitoring of vector using ovitrap.  
540 Putrajaya: Division of Disease Control, the Ministry of Health. 2005: Malay.

- 541 23. Mohiddin A, Jaal Z, Lasim AM, Dieng H, Zuharah WF. Assessing dengue outbreak areas  
542 using vector surveillance in north east district, Penang Island, Malaysia. *Asian Pac J Trop*  
543 *Biomed.* 2015; 5(11): 869-876. [https://doi.org/10.1016/S2222-1808\(15\)60947-1](https://doi.org/10.1016/S2222-1808(15)60947-1)
- 544 24. WHO. Guidelines for laboratory and field evaluation of mosquito larvicides. WHO  
545 communicable disease control, prevention and eradication. WHO Pesticide Evaluation  
546 Scheme. Geneva, Switzerland. WHO/CDS/WHOPES/GCDPP/2005.13; 2005.
- 547 25. Caputo B, Manica M, D'Alessandro A, Botta G, Filipponi F, Protano C, Vitali M, Rosa R,  
548 Torre AD. Assessment of the effectiveness of a seasonal-long insecticide-based control  
549 strategy against *Aedes albopictus* nuisance in an urban area. *PLoS Negl Trop Dis.* 2016;  
550 10(3): e0004463. <https://doi.org/10.1371/journal.pntd.0004463>
- 551 26. Harburguer L, Licastro S, Masuh H, Zerba E. Biological and chemical characterization of  
552 a new larvicide ovitrap made of plastic with pyriproxyfen incorporated for *Aedes aegypti*  
553 (Diptera: Culicidae) control. *J Med Entomol.* 2016; 53(3): 647-652.  
554 [doi:10.1093/jme/tjw022](https://doi.org/10.1093/jme/tjw022)
- 555 27. Othman H., Nordin SA, Abdul Rashid N, Abas MBH, Hod R, Sahani M. Dengue-free  
556 community as an approach for understanding the value and challenges of inter-agencies  
557 partnerships in an intervention program. *Int J Community Med Public Health.* 2017;  
558 4(6):1819-1826. <http://dx.doi.org/10.18203/2394-6040.ijcmph20172139>
- 559 28. Biswas D, Biswas B, Mandal B, Banerjee A. A note of distribution of breeding sources of  
560 *Aedes aegypti* (Linnaeus) in the city of Kolkata, India, following an outbreak of dengue  
561 during 2012. *Current Urban Studies.* 2014; 2: 57-61. [doi:10.4236/cus.2014.21006](https://doi.org/10.4236/cus.2014.21006)

- 562 29. Garcia-Sanchez DC, Pinilla GA, Quintero J. Ecological characterization of *Aedes aegypti*  
563 larval habitats (Diptera: Culicidae) in artificial water containers in Girardot, Colombia, J  
564 Vector Ecol. 2017; 42(2): 289-297. doi: 10.1111/jvec.12269.
- 565 30. Nilsson LKJ, Sharma, Bhatnagar RK, Bertilsson S, Terenius O. Presence of *Aedes* and  
566 *Anopheles* mosquito larvae is correlated to bacteria found in domestic water-storage  
567 containers. FEMS Microbiol Ecol. 2018; 94(6). doi: 10.1093/femsec/fiy058.
- 568 31. Zul-‘Izzat Ikhwan Zaini, Hidayatulfathi Othman, Norhafizah Karim, Nor Azimah Abd  
569 Rashid, Mohamad Badrul Hisham Abas, Mazrura Sahani, Rozita Hod and Saiful Azlan  
570 Nordin. Knowledge and Practices Regarding Aedes Control Amongst Residents of Dengue  
571 Hotspot Areas in Selangor: A Cross-Sectional Study. Sains Malaysiana. 2019; 48(4): 841–  
572 849.
- 573 32. Tokachil N, Yusoff N. Effect of rainfall duration on *Aedes aegypti* population. AIP  
574 Conference Proceedings. 2018; 1974(1). <https://doi.org/10.1063/1.5041612>
- 575 33. Valdez LD, Sibona GJ, Condat CA. Impact of rainfall on *Aedes aegypti* populations.  
576 Ecological Modelling. 2018; 385: 96-105. <https://doi.org/10.1016/j.ecolmodel.2018.07.003>
- 577 34. Silva FD, Santos AM, Correa RGC, Caldas AJM. Temporal relationship between rainfall,  
578 temperature and occurrence of dengue cases in São Luis, Maranhão, Brazil. Cien Saude  
579 Colet. 2016; 21(2): 641-6. <http://dx.doi.org/10.1590/1413-81232015212.09592015>
- 580 35. Stewart Ibarra AM, Ryan SJ, Beltran E, Meija R, Silva M, Munoz A. Dengue vector  
581 dynamics (*Aedes aegypti*) influence by climate and social factors in Ecuador: Implications  
582 for targeted control. PLoS One. 2013; 8(11): e78263. [https://doi.org/10.1371/journal.pone.](https://doi.org/10.1371/journal.pone.0078263)  
583 [0078263](https://doi.org/10.1371/journal.pone.0078263)

- 584 36. Barrera R, Acevedo V, Felix GE, Hemme RR, Vazquez J, Munoz JL, Amador M. Impact  
585 of autocidal gravid ovitraps on chikungunya virus incidence in *Aedes aegypti* (Diptera:  
586 Culicidae) in areas with and without traps. *J Med Entomol.* 2017; 54(2): 387-395. doi:  
587 10.1093/jme/tjw187.
- 588 37. Tsai PJ, Lin TH, Teng HJ, Yeh HC. Critical low temperature for the survival of *Aedes*  
589 *aegypti* in Taiwan. *Parasites & Vectors.* 2018; 11: 22. doi: 10.1186/s13071-017-2606-6.
- 590 38. Schmidt CA, Comeau G, Monaghan AJ, Williamson DJ, Ernst KC. Effects of desiccation  
591 stress on adult female longevity in *Aedes aegypti* and *Aedes albopictus* (Diptera:  
592 Culicidae): results of a systematic review and pooled survival analysis. *Parasites &*  
593 *Vectors.* 2018; 11: 267. doi: 10.1186/s13071-018-2808-6.
- 594 39. Zapletal J, Erraguntla M, Adelman ZN, Myles KM, Lawley MA. Impacts of diurnal  
595 temperature and larval density on aquatic development of *Aedes aegypti*. *PLoS ONE.* 2018;  
596 13(3): e0194025
- 597 40. Azhar ZI, Jusoh A, Syed Abdul Rahim SS, Hassan MR, Safian N, Shah SA. Temporal  
598 spatial distribution of dengue and implications on control in Hulu Langat, Selangor,  
599 Malaysia. *Dengue Bulletin* 39: 19-31 (2016).
- 600 41. Mordecai EA, Cohen JM, Evan MV, Gudapati P, Johnson LR, Lippi CA, et al. Detecting  
601 the impact of temperature on transmission of Zika, dengue, and chikungunya using  
602 mechanistic models. *PLoS Negl Trop Dis.* 2017; 11(4): e0005568. doi:  
603 10.1371/journal.pntd.0005568
- 604 42. Othman H., Zul-Izzat Ikhwan Zaini, Norhafizah Karim, Nor Azimah Abd Rashid,  
605 Muhammad Badrul Hisham Abas, Mazrura Sahani, Rozita Hod, Faiz Daud, Saiful Azlan  
606 Nordin, Nor Azwani Mohamed Nor. Applying health belief model for the assessment of

- 607 community knowledge, attitude and prevention practices following a dengue epidemic in  
608 a township in Selangor, Malaysia. *Int J Community Med Public Health*. 2019; 6(3):958-  
609 970. doi: 10.18203/2394-6040.ijcmph20190578
- 610 43. Massad E, Amaku M, Coutinho FAB, Struchiner CJ, Lopez LF, Wilder-Smith A, Burattini  
611 MC. Estimating the size of *Aedes aegypti* populations from dengue incidence data:  
612 implications for the risk of yellow fever outbreaks. *Infectious Disease Modelling*. 2017;  
613 2(4): 441-454. doi: 10.1016/j.idm.2017.12.001
- 614 44. Cromwell EA, Stoddard ST, Barker CM, Van Rie A, Messer WB, Meshnick SR, Morrison  
615 AC, Scott TW. The relationship between entomological indicators of *Aedes aegypti*  
616 abundance and dengue virus infection. *PLoS Negl Trop Dis*. 2017; 11(3): e0005429. doi:  
617 10.1371/journal.pntd.0005429
- 618 45. Luo L, Li X, Xiao X, Xu Y, Huang M, Yang Z. Identification of *Aedes albopictus* larval  
619 index thresholds in the transmission of dengue in Guangzhou, China. *J Vector Ecol*. 2015;  
620 40(20): 240-6. doi: 10.1111/jvec.12160.
- 621 46. Bowman LR, Runge-Ranzinger S, McCall PJ. Assessing the relationship between vector  
622 indices and dengue transmission: a systematic review of the evidence. *PLoS Negl Trop*  
623 *Dis*. 2015; 8(5): e2848. doi: 10.1371/journal.pntd.0002848
- 624 47. Overgaard HJ, Pientong C, Thaewngiew K, Bangs MJ, Ekalaksananan T, Aromseree S,  
625 Phanitchat T, et al. Assessing dengue transmission risk and a vector control intervention  
626 using entomological and immunological indices in Thailand: study protocol for a cluster-  
627 randomized controlled trials. *Trials*. 2018; 19(1): 122. doi: 10.1186/s13063-018-2490-1.
- 628 48. Cromwell EA, Stoddard ST, Barker CM, Van Rie A, Messer WB, Meshnick SR, Morrison  
629 AC, Scott TW. The relationship between entomological indicators of *Aedes aegypti*

- 630 abundance and dengue virus infection. PLoS Negl Trop Dis. 2017; 11(3): e0005429. doi:  
631 10.1371/journal.pntd.0005429.
- 632 49. Ahmad R, Suzilah I, Wan Najdah WMA, Topek O, Mustafakamal I, Lee HL. Factors  
633 determining dengue outbreaks in Malaysia. PLoS ONE. 2018; 13(2): e0193326. doi:  
634 10.1371/journal.pone.0193326
- 635 50. Pang T, Mak TK, Gubler DJ. Prevention and control of dengue-the light at the end of the  
636 tunnels. Lancet Infect Dis. 2017; 17(3): e79-e87. doi: 10.1016/S1473-3099(16)30471-6
- 637 51. Marcombe S, Darriet F, Tolosa M, Agnew P, Duchon S, Etienne M, Tcha MMY, Chandre  
638 F, Corbel V, Yebakima A. Pyrethroid resistance reduces the efficacy of spaces sprays for  
639 dengue control on the Island of Martinique (Caribbean). PLoS Negl Trop Dis. 2011; 5(6):  
640 e1202. doi: 10.1371/journal.pntd.0001202
- 641 52. Maciel-de-Freitas R, Valle D. Challenges encountered using standard vector control  
642 measures for dengue in Boa Vista, Brazil. Bull World Health Organ. 2014; 92: 685-689.  
643 doi: 10.2471/BLT.13.119081
- 644 53. Lloyd AM, Farooq M, Estep AS, Xue RD, Kline DL. Evaluation of pyriproxyfen  
645 dissemination via *Aedes albopictus* from a point-source larvicide application in Northeast  
646 Florida. J Am Mosq Control Assoc. 2017; 33(2): 151-155. doi: 10.2987/14-6459.1.
- 647 54. Mains JW, Brelsfoard CL, Dobson SL. Male mosquitoes as vehicles for insecticide. PLoS  
648 Negl Trop Dis. 2015; 9(1): e0003406. doi: 10.1371/journal.pntd.0003406
- 649 55. Suman DS, Wang Y, Bilgrami AL, Gaugler R. Ovicidal activity of three insect growth  
650 regulatos against *Aedes* and *Culex* mosquitoes. Acta Tropica. 2013; 128: 103-109. doi:  
651 10.1016/j.actatropica.2013.06.025



- 652 56. Suman DS, Wang Y, Gaugler R. The insect growth regulator pyriproxyfen terminates egg  
653 diapause in the Asian tiger mosquitoes, *Aedes albopictus*. PLoS ONE. 2015; 10(6):  
654 e0130499. doi: 10.1371/journal.pone.0130499.
- 655 57. Sihuincha M, Zamora-Perea E, Orellana-Rios W, Stancil JD, Lopez-Sifuentes V, Vidal-  
656 Ore C, Devine GJ. Potential use of pyriproxyfen for control of *Aedes aegypti* (Diptera:  
657 Culicidae) in Iquitos, Peru. J Med Entomol. 2005; 42(4): 620-630
- 658 58. Kartzinel MA, Alto BW, Deblasio MW, Burkett-Cadena ND. Testing of visual and  
659 chemical attractants in correlation with the development and field evaluation of an  
660 autodissemination station for the suppression of *Aedes aegypti* and *Aedes albopictus* in  
661 Florida. J Am Mosq Contro Assoc. 2016; 32(3): 194-202.
- 662 59. Swale DR, Li Z, Kraft JZ, Healy K, Liu M, David CM, Foil LD. Development of an  
663 autodissemination strategy for the development of novel control agents targeting the  
664 common malaria mosquito, *Anopheles quadrimaculatus* say (Diptera: Culicidae). PLoS  
665 Negl Trop Dis. 2017; 12(4): e0006259. doi: 10.1371/journal.pntd.0006259
- 666 60. Lwetoijera D, Harris C, Kiware S, Dongus S, Devine GJ, McCall PJ, Majambere S.  
667 Effective autodissemination of pyriproxyfen to breeding sites by the exophilic malaria  
668 vector *Anopheles arabiensis* in semi-field settings in Tanzania. Malaria Journal. 2014;  
669 13:161. doi: 10.1186/1475-2875-13-161.
- 670 61. Bell Chism D, Apperson CS. Horizontal transfer of the insect growth regulators  
671 pyriproxyfen to larval microcosms by gravid *Aedes albopictus* and *Ochlerotatus triseriatus*  
672 mosquitoes in the laboratory. Med Vet Entomol. 2003; 17(2): 211-20.
- 673 62. Y. Liang, M. N. Ahmad Mohiddin, R. Bahauddin, F. O. Hidayatul, W. A. Nazni, H. L. Lee,  
674 D. Greenhalgh. Modelling the Effect of a Novel Autodissemination Trap on the Spread of

- 675 Dengue in Shah Alam and Malaysia. *Computational and Mathematical Methods in*  
676 *Medicine* (2019). 2019; <https://doi.org/10.1155/2019/1923479>.
- 677 63. Jiggins FM. The spread of *Wolbachia* through mosquito populations. *PLoS Biol.* 2017;  
678 15(6): e2002780. doi: 10.1371/journal.pbio.2002780
- 679 64. Iyaloo DP, Elahee KB, Bheecarry A, Lees RS. Guidelines to site selection for population  
680 surveillance and mosquito control trials: a case study from Mauritius. *Acta Tropica.* 2014;  
681 132S: S140-S149. doi: 10.1016/j.actatropica.2013.11.011.
- 682 65. Arbaoui AA, Chua TH. Bacteria as a source of oviposition attractant for *Aedes aegypti*  
683 mosquitoes. *Trop Bimed.* 2014; 31(1): 134-142.
- 684 66. Liu H, Dixon D, Bibbs CS, Xue RD. Autocidal gravid ovitrap incorporation with attractants  
685 for control of gravid and host-seeking *Aedes aegypti* (Diptera: Culicidae). *J Med Entomol.*  
686 2018; tjy207. doi: 10.1093/jme/tjy207.
- 687 67. Dhanique CTJ, Mohammed T, Mohammed A. Yeast-generated CO<sub>2</sub>: a convenient source  
688 of carbon dioxide for mosquito trapping using the BG-Sentinel® traps. *Asian Pac J Trop*  
689 *Biomed.* 2017; 7(10): 896-900. <https://doi.org/10.1016/j.apjtb.2017.09.014>

690

691

692

693

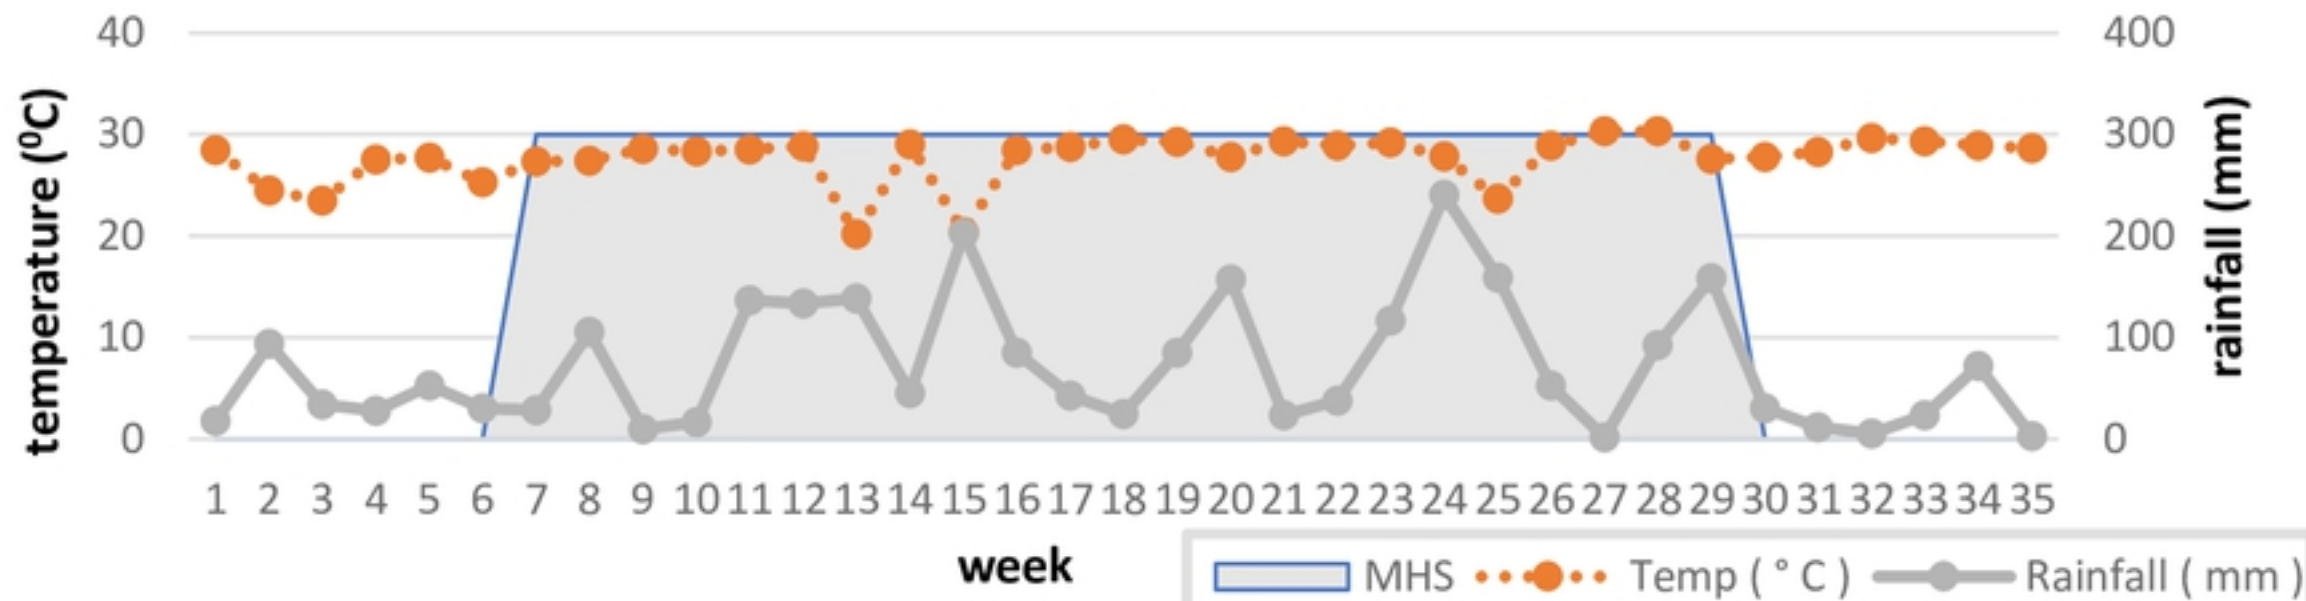

Figure 2

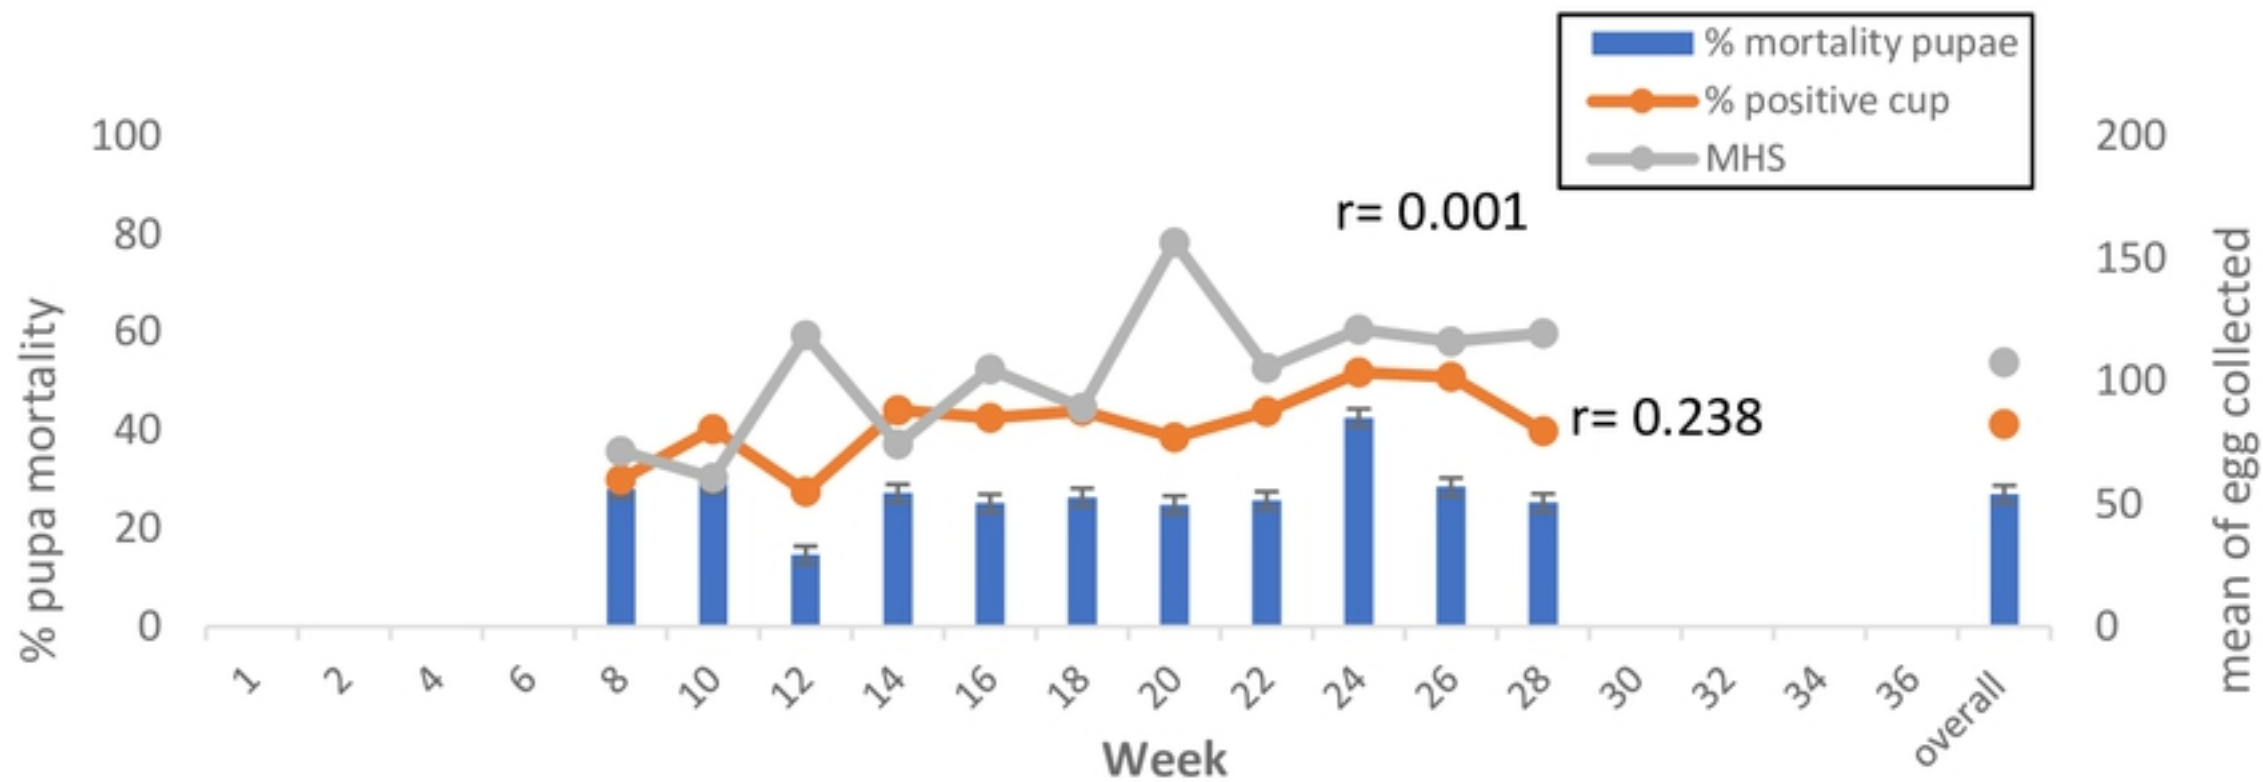

Figure 3

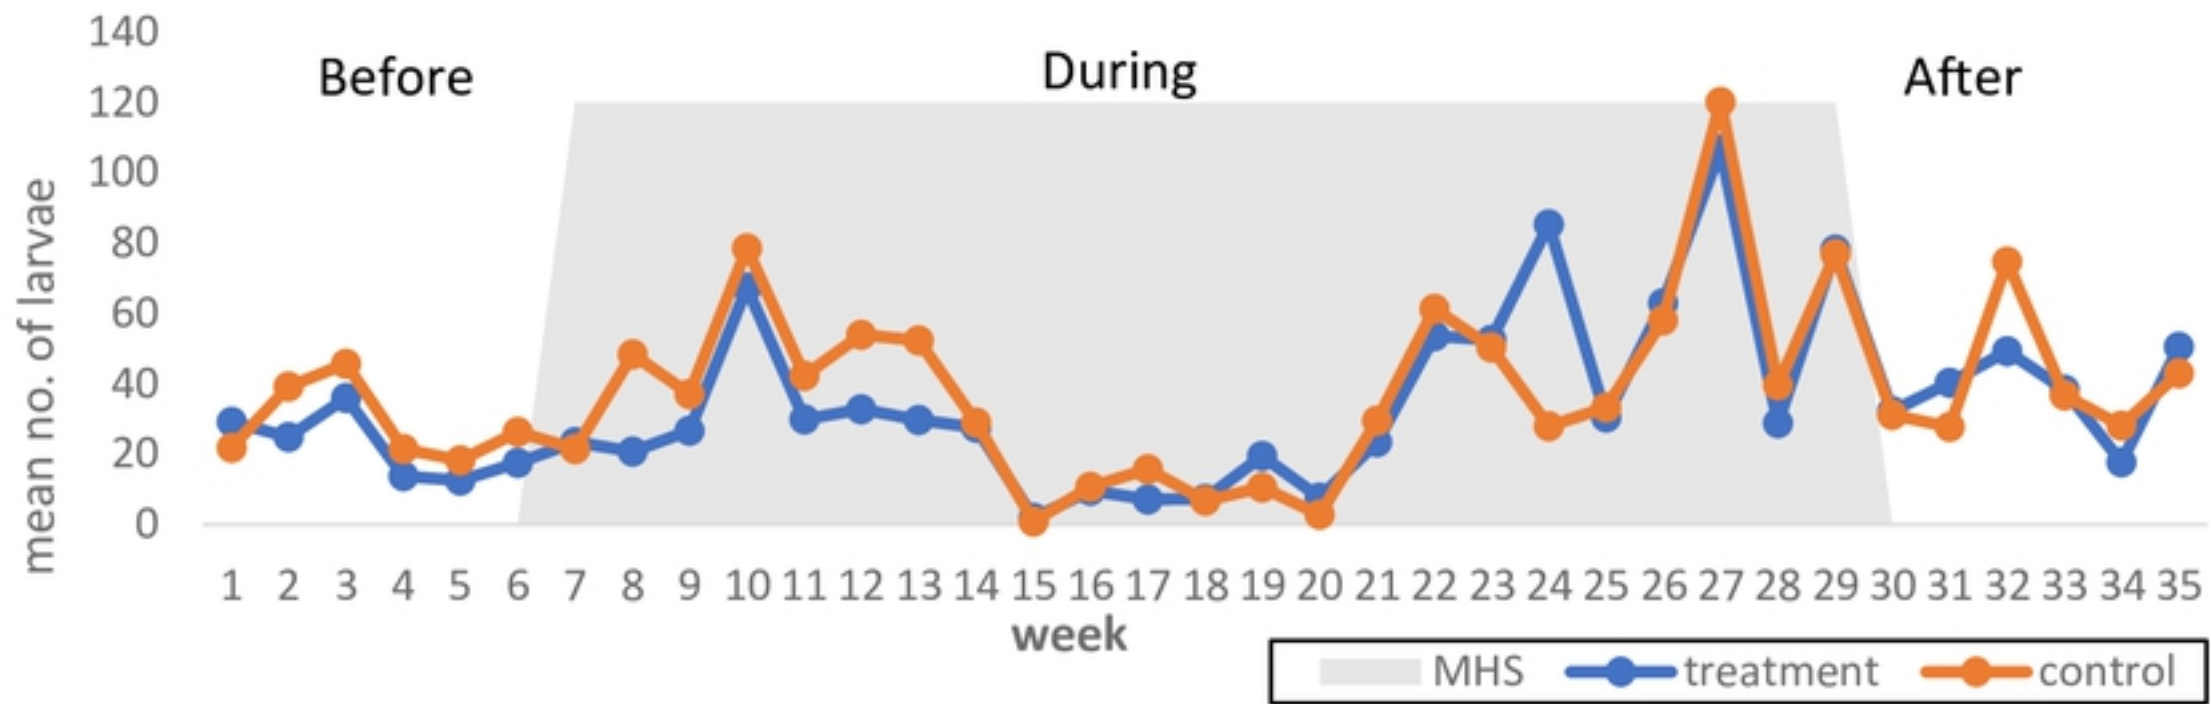

Figure 4

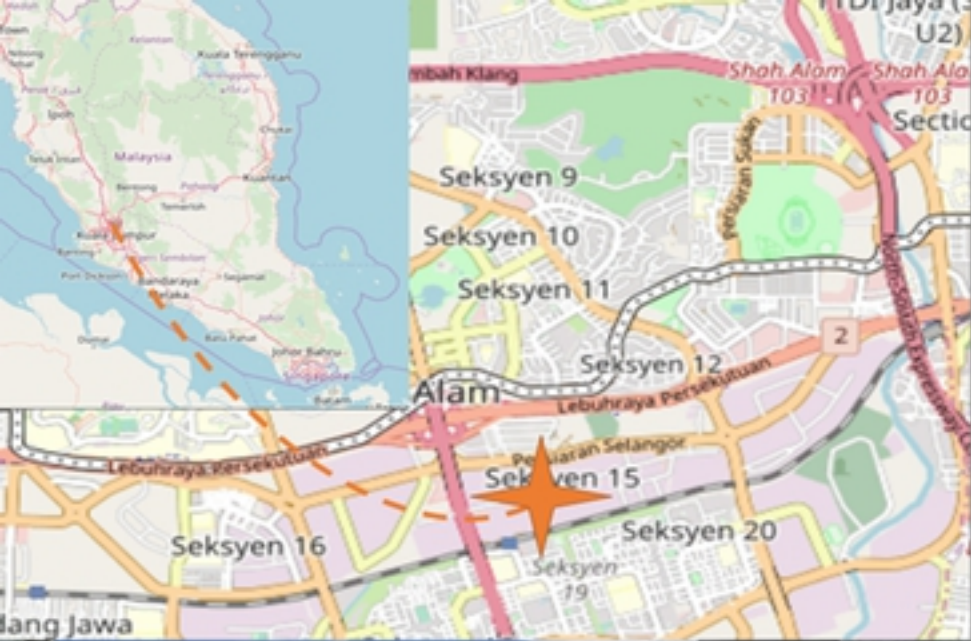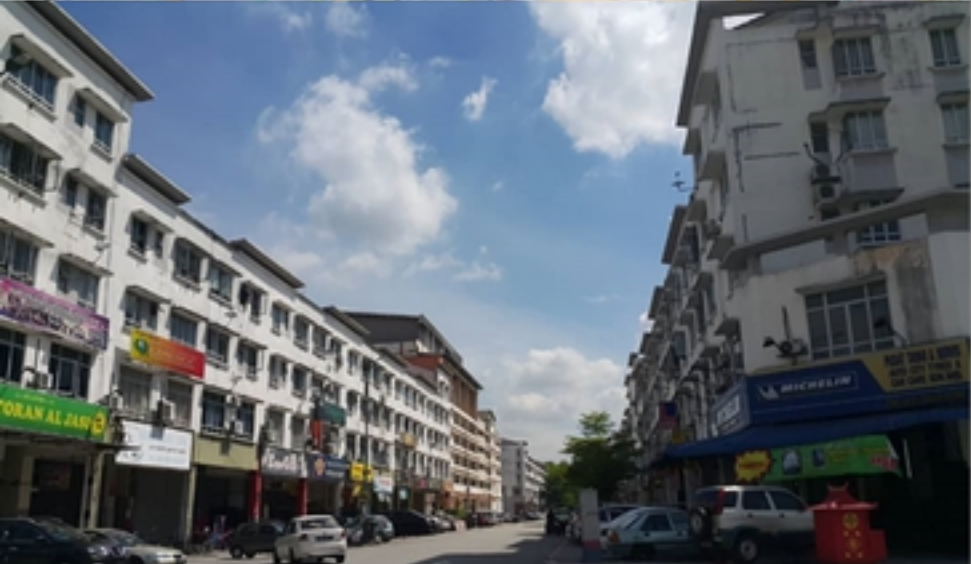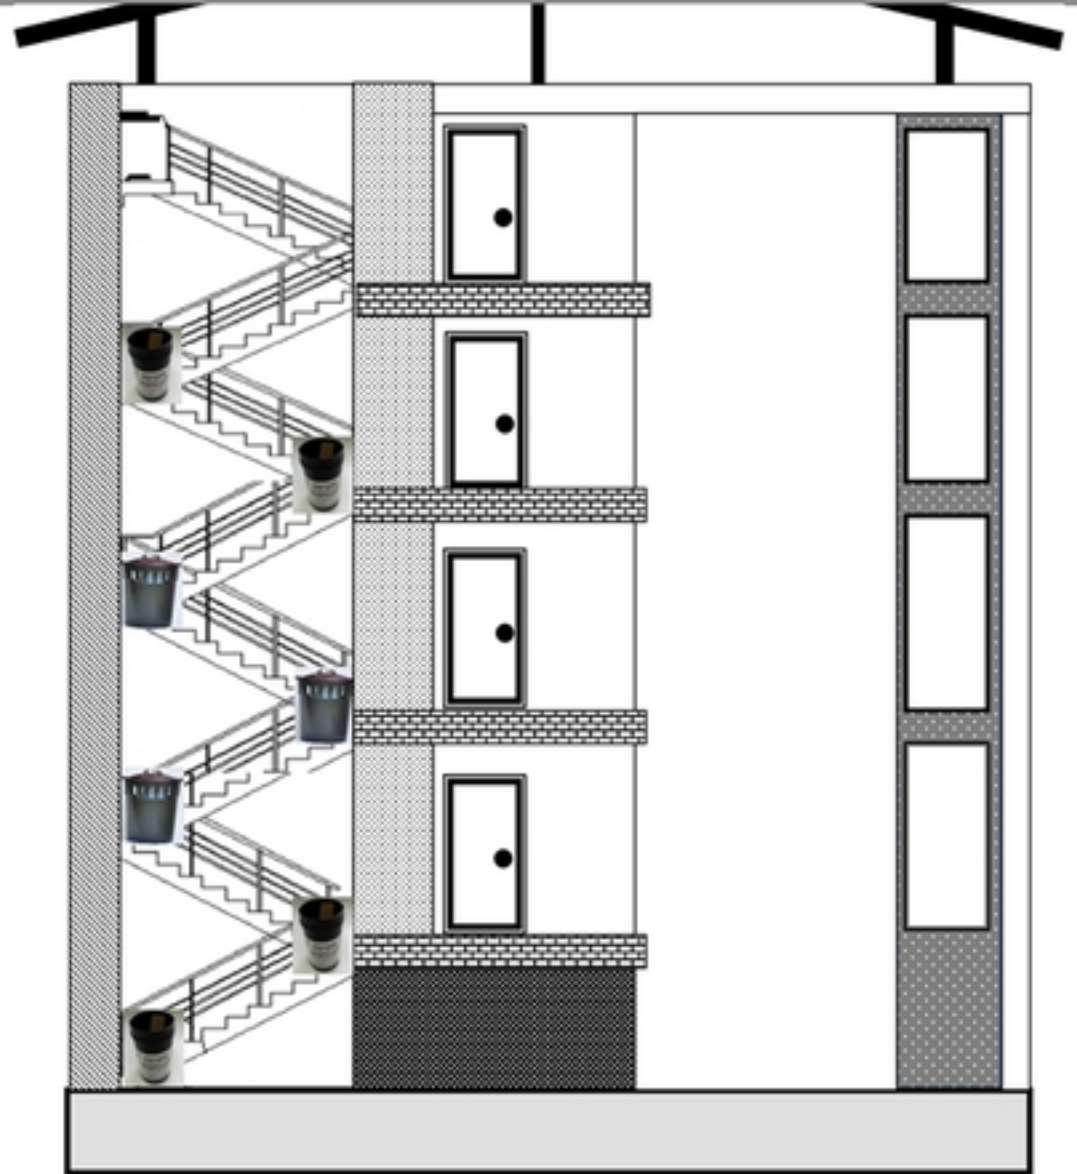

Figure 1
